# Supplementary material for: Comparative Survey of People with ME/CFS in Italy, Latvia, and the UK: A Report on Behalf of the Socioeconomics Working Group of the European ME/CFS Research Network (EUROMENE)
Source: MDPI journal article supplement (doi:10.3390/medicina57030300), 2021-03-23
Supplement: s1 [file s1]

## Anketa pacientam "Hroniskais noguruma sindroms"

Anketa ir sagatavota COST (*Cooperation in Science and Technology*) projekta EUROMENE zinātniskā tīkla ietvaros, kurā Rīgas Stradiņa universitāte pārstāv Latviju un kura izveidošanas mērķi ir saistīti ar Mialģiskā encefalomiēlīta/ Hroniskā noguruma sindroma (ME/HNS) padziļinātu izpēti un starpvalstu sadarbību vienotas pieejas izstrādāšanai ME/HNS diagnostikai un multidisciplināras ārstēšanas vadlīniju izstrādāšanai. Anketa ir izveidota, lai noskaidrotu HNS slimnieku zināšanas par HNS slimību, saņemto veselības aprūpi un problēmām, kas saistītas ar HNS ietekmi uz dzīves kvalitāti.

HNS raksturīgākie simptomi ir hronisks nogurums vismaz pusgada laikā, kas nav atvieglojams ar atpūtu; galvassāpes, muskuļu sāpes, palielināti limfmezgli, locītavu sāpes, kakla sāpes, atmiņas traucējumi, miega problēmas. Bieži vien šiem simptomiem pievienojas arī depresija, ja slimnieka stāvoklis ir smags un dzīves kvalitāte ir zema. HNS var izpausties arī kā centrālās nervu sistēmas, imūnsistēmas, šūnu metabolisma, sirds un asinsvadu darbības traucējumi.

Ja saskatāt, ka minētie simptomi Jums lielākā vai mazākā mērā ir raksturīgi, aicinām aizpildīt pievienoto anketu un ar savu dalību veicināt hroniskā noguruma sindroma pacientu veselības aprūpes uzlabošanu.

Anketas aizpildīšanai nepieciešamas aptuveni 20 minūtes.

### 1. Kad slimība (noturīgi simptomi) ir sākusies (norādiet aptuveni gadu un mēnesi) ?

### 2. Kā Jūs vērtējat savu pašreizējo stāvokli – vai slimība ir akūtā, vai hroniskā fāzē ?

Akūtā ☐

Hroniskā ☐

### 3. Kādus simptomus novērojat ? (vairākas atbildes ir iespējamas)

Epizodisks nogurums ☐

Noturīgs nogurums ☐

Svārstīgs nogurums (*raksturojams ar svārstībām  
starp sliktākiem un labvēlīgākiem periodiem*) ☐

Gripas simptomiem līdzīgs nespēks ☐

Galvassāpes ☐

Kakla sāpes ☐

Muskuļu sāpes ☐

Paaugstināta vai pazemināta ķermeņa vidējā temperatūra  
(*norādiet, kāda ir ķermeņa vidējā temperatūra*)

Svārstīgs asinsspiediens ☐

Kuņģa-zarnu trakta traucējumi ☐

Urinēšanas traucējumi ☐

Palielināti limfmezgli ☐

Koncentrēšanās grūtības ☐

|                                       |                          |
|---------------------------------------|--------------------------|
| Atmiņas traucējumi                    | <input type="checkbox"/> |
| Psiholoģiskais diskomforts (trauksme) | <input type="checkbox"/> |
| Nomākts garastāvoklis                 | <input type="checkbox"/> |
| Miega traucējumi                      | <input type="checkbox"/> |
| Citi simptomi (norādiet) _____        |                          |

---

**4. Vai novērotie simptomi ir konstanti vai variē ?**

|           |                          |
|-----------|--------------------------|
| Konstanti | <input type="checkbox"/> |
| Mainīgi   | <input type="checkbox"/> |

**5. Vai Jums ir noteikta kāda no diagnozēm, kas ir saistītas ar Hroniskā noguruma sindromu (turpmāk – HNS diagnoze) ?**

|                                                                                  |                          |
|----------------------------------------------------------------------------------|--------------------------|
| ICD 10 kods G93.3 – nogurums pēc vīrusa infekcijas (mialģiskais encefalomyelīts) | <input type="checkbox"/> |
| ICD 10 kods R53 (īpaši 53.82) – patoloģisks nogurums un nespēks                  | <input type="checkbox"/> |
| ICD 10 kods B94.8 – citu precizētu infekcijas un parazitāru slimību sekas        | <input type="checkbox"/> |
| Diagnoze nav noteikta                                                            | Pārejiet pie 8.jautājuma |

**6. Cik ilgs laiks ir pagājis no pirmo noturīgo simptomu parādīšanās līdz HNS diagnozes noteikšanai ?**

|                |                          |
|----------------|--------------------------|
| 3 mēnešu laikā | <input type="checkbox"/> |
| 1 gada laikā   | <input type="checkbox"/> |
| > 1 gada       | <input type="checkbox"/> |

**7. Kādas specialitātes ārsts ir noteicis Jums HNS diagnozi ?**

|                                   |                          |
|-----------------------------------|--------------------------|
| Ģimenes ārsts                     | <input type="checkbox"/> |
| Neirologs                         | <input type="checkbox"/> |
| Infektologs                       | <input type="checkbox"/> |
| Cits speciālists (norādiet) _____ |                          |

---

**8. Vai Jums ir veiktas kādas medicīniskās pārbaudes saistībā ar HNS ?**

|    |                          |
|----|--------------------------|
| Jā | <input type="checkbox"/> |
| Nē | <input type="checkbox"/> |

Ja atbilde ir "Jā", norādiet, kādas (vairākas atbildes ir iespējamās):

|                                      |                          |
|--------------------------------------|--------------------------|
| Standarta laboratoriskie izmeklējumi | <input type="checkbox"/> |
| Infekcijas testi                     | <input type="checkbox"/> |
| Imunoloģiskie testi                  | <input type="checkbox"/> |
| Iekaisuma testi                      | <input type="checkbox"/> |
| Vairogdziedzera pārbaudes            | <input type="checkbox"/> |
| Radioloģiskie izmeklējumi            | <input type="checkbox"/> |
| Kardioloģiskie izmeklējumi           | <input type="checkbox"/> |
| Gastroenteroloģiskie izmeklējumi     | <input type="checkbox"/> |
| Pulmonoloģiskie izmeklējumi          | <input type="checkbox"/> |
| Endokrinoloģiskie izmeklējumi        | <input type="checkbox"/> |
| Psihiatriskie izmeklējumi            | <input type="checkbox"/> |
| Neiroloģiskie izmeklējumi            | <input type="checkbox"/> |

Cita veida izmeklējumi (norādiet) \_\_\_\_\_

**9. Vai Jums ir noteikta kāda ar HNS nesaistītā hroniskā saslimšana ?**

Jā ☐ Nē ☐

Ja atbilde ir "Jā", vēlams norādīt konkrētas diagnozes:

\_\_\_\_\_  
\_\_\_\_\_

**10. Vai Jūs regulāri apmeklējat kādu ārstu saistībā ar HNS ? norādiet, kādu:**

Neapmeklēju ☐

Apmeklēju: ☐

Ģimenes ārsts

Neirologs

Infektologs

Cits speciālists \_\_\_\_\_

| Reizi mēnesī | Reizi ceturksnī | Reizi gadā | Reizi 2 gados | Retāk kā reizi 2 gados |
|--------------|-----------------|------------|---------------|------------------------|
|              |                 |            |               |                        |
|              |                 |            |               |                        |
|              |                 |            |               |                        |
|              |                 |            |               |                        |

**11. Kādas metodes Jūs izmantojat HNS seku mazināšanai ? (vairākas atbildes ir iespējamas)**

Vispārārstzītā (alopātiskā) medicīna ☐

Homeopātija ☐

Osteopātija ☐

Psihoterapija ☐

Fitoterapija ☐

Cita metode (norādiet) \_\_\_\_\_

**12. Kādas metodes (un preparātus) Jūs izmantojās HNS akūtajos stāvokļos ? (vairākas atbildes ir iespējamas)**

Recepšu zāles ☐

Bezrecepšu zāles ☐

Uztura bagātinātāji ☐

Fizioterapija ☐

Osteopātija ☐

Homeopātija ☐

Psihoterapija ☐

Cita metode (norādiet) \_\_\_\_\_

**13. Kura no metodēm (vai metožu kombinācijām), Jūsprāt, deva labāku rezultātu? (norādiet)**

\_\_\_\_\_  
\_\_\_\_\_

**14. Vai lietojāt kādus medikamentus saistībā ar HNS ? (vairākas grupas ir iespējamas):**

Pretiekaisuma ☐

Pretsāpju ☐

Pretvīrusu ☐

Nomierinošie ☐

Antidepresanti ☐

Vitamīni un minerālvielas ☐

Citi (norādiet) \_\_\_\_\_

Nelietoju ☐

**15. Norādiet vidējās izmaksas mēnesī (euro), cik tērējat HNS ārstēšanai un negatīvu seku mazināšanai**

|                                                                            |                      |      |
|----------------------------------------------------------------------------|----------------------|------|
| Zāles                                                                      | <input type="text"/> | euro |
| Uztura bagātinātāji                                                        | <input type="text"/> | euro |
| Konvenciālās medicīnas veselības aprūpes pakalpojumi (vizītes pie ārstiem) | <input type="text"/> | euro |
| Homeopātija                                                                | <input type="text"/> | euro |
| Osteopātija                                                                | <input type="text"/> | euro |
| Psihoterapija                                                              | <input type="text"/> | euro |
| Fitoterapija                                                               | <input type="text"/> | euro |
| Cita metode (norādiet) _____                                               | <input type="text"/> | euro |

**16. Ja Jūs zaudējat darba spējas HNS saasinājuma fāzē un nevarat apmeklēt darbu, norādiet, cik vidēji darba dienas tiek zaudētas noteiktajā laika periodā (piemēram, mēnesī)**

**17. Vai darba nespējas laikā Jūs aprūpējat sevi patstāvīgi, vai ar kāda palīdzību ?**

|                                   |                          |
|-----------------------------------|--------------------------|
| Patstāvīgi                        | <input type="checkbox"/> |
| Ģimenes locekļi                   | <input type="checkbox"/> |
| Aprūpētājs                        | <input type="checkbox"/> |
| Cita alternatīva (norādiet) _____ |                          |

**18. Atzīmējiet, ja Jums sagādā grūtības izskaidrot ar HNS saistītos simptomus, izjūtas un sekas (vairākas atbildes ir iespējamas):**

|                                |                          |
|--------------------------------|--------------------------|
| Ārstam                         | <input type="checkbox"/> |
| Ģimenes locekļiem (radniekiem) | <input type="checkbox"/> |
| Draugiem                       | <input type="checkbox"/> |
| Darba devējam (un kolēģiem)    | <input type="checkbox"/> |

**19. Norādiet, kādas ikdienas aktivitātes sagādā grūtības saistībā ar HNS (1.kolonnā) un kāds ir Jūsu pašreizējais pašvērtējums – no 1 līdz 10 (cik augsti novērtējat pašreizējās spējas un stāvokli konkrētajā jomā: 1 – zemākais līmenis, 10 – augstākais līmenis) (2.kolonnā)**

|                                       |                          |                      |
|---------------------------------------|--------------------------|----------------------|
| Darbs (arī mācības un ģimenes aprūpe) | <input type="checkbox"/> | <input type="text"/> |
| Pašaprūpe                             | <input type="checkbox"/> | <input type="text"/> |
| Mobilitāte                            | <input type="checkbox"/> | <input type="text"/> |
| Emocionālais stāvoklis                | <input type="checkbox"/> | <input type="text"/> |
| Fiziskais stāvoklis                   | <input type="checkbox"/> | <input type="text"/> |

**20. Novērtējiet ar atzīmi no 1 (zemākais līmenis) līdz 10 (augstākais līmenis) savu ar veselības stāvokli saistīto dzīves kvalitāti pēdējā gada laikā**

**21. Novērtējiet ar atzīmi no 1 (zemākais līmenis) līdz 10 (augstākais līmenis) savu ar veselības stāvokli saistīto dzīves kvalitāti pirms HNS konstatācijas**

**22. Kā Jūs vērtējat savas saslimšanas smaguma pakāpi ?**

|        |                          |
|--------|--------------------------|
| Viegla | <input type="checkbox"/> |
| Vidēja | <input type="checkbox"/> |
| Smaga  | <input type="checkbox"/> |

**23. Kuri no HNS simptomiem, Jūsaprāt, ir vissmagākie ? (norādiet)**

**24. Kādi, Jūsaprāt, ir HNS galvenie cēloņi ? (vairākas atbildes ir iespējamas)**

- |                          |                          |
|--------------------------|--------------------------|
| Emocionālais stāvoklis   | <input type="checkbox"/> |
| Darba apstākļi           | <input type="checkbox"/> |
| Ģenētiskā pārmantojamība | <input type="checkbox"/> |
| Autoimūnā saslimšana     | <input type="checkbox"/> |
| Infekcijas slimība       | <input type="checkbox"/> |
| Vides faktori            | <input type="checkbox"/> |
| Citi faktori (norādiet)  | _____                    |

**25. Vai, Jūsaprāt, HNS simptomi tuvākajā nākotnē var izraisīt negatīvas izmaiņas Jūsu dzīves sfērās (vairākas atbildes ir iespējamas)**

- |                               |                          |
|-------------------------------|--------------------------|
| Darbā, profesionālajā karjerā | <input type="checkbox"/> |
| Ikdienas aktivitāšu veikšanā  | <input type="checkbox"/> |
| Fiziskajā veselībā            | <input type="checkbox"/> |
| Mentālajā veselībā            | <input type="checkbox"/> |
| Citos aspektos (norādiet)     | _____                    |

**26. Vai Jūs saskatāt iespējas pilnīgi izārstēties no HNS ?**

- |    |                          |
|----|--------------------------|
| Jā | <input type="checkbox"/> |
| Nē | <input type="checkbox"/> |

**27. Vai Jūs veicat kādus profilaktiskus un veselības uzlabošanas pasākumus ? (vairākas atbildes ir iespējamas)**

- |                                                          |                          |
|----------------------------------------------------------|--------------------------|
| Regulāras sporta nodarbības                              | <input type="checkbox"/> |
| Atteikšanās no smēķēšanas un citiem kaitīgiem ieradumiem | <input type="checkbox"/> |
| Veselīgs uzturs                                          | <input type="checkbox"/> |
| Psiholoģisko noturību veicinošās prakses                 | <input type="checkbox"/> |
| Harmonizēts darba un atpūtas režīms                      | <input type="checkbox"/> |
| Fizioloģiskā miega režīma ievērošana                     | <input type="checkbox"/> |
| Citi pasākumi (norādiet)                                 | _____                    |

Lūgums norādīt informāciju par sevi (Jūsu dati tiks izmantoti tikai apkopotā veidā pētījuma mērķiem)

**28. Jūsu dzimšanas gads**

**29. Dzimums**

- |          |                          |
|----------|--------------------------|
| Sieviete | <input type="checkbox"/> |
| Vīrietis | <input type="checkbox"/> |

**30. Izglītība**

- |                     |                          |
|---------------------|--------------------------|
| Pamata              | <input type="checkbox"/> |
| Vidējā              | <input type="checkbox"/> |
| Vidējā profesionālā | <input type="checkbox"/> |
| Augstākā            | <input type="checkbox"/> |

**31. Pamatnodarbošanās**

- Uzņēmējs ☐  
Algotais darbinieks ☐  
Pašnodarbinātā persona ☐  
Students ☐  
Nestrādājošais pensionārs ☐  
Mājsaimniece ☐  
Cits \_\_\_\_\_

**32. Ģimenes stāvoklis**

- Precējies (-usies) ☐  
Neprecējies (-usies) ☐  
Atraitnis (-e) ☐  
Šķīries (-usies) ☐

**33. Mājsaimniecība**

- Patstāvīga ☐  
Kopīga ar ģimenes locekļiem ☐  
Cits variants \_\_\_\_\_

**34. Bērnu skaits Jūsu ģimenē****35. Jūsu vidējie ienākumi mēnesī (pēc nodokļu atskaitīšanas) uz vienu ģimenes locekli vai**

kopīgas mājsaimniecības locekli

euro

**36. Dzīves vieta (atzīmējiet vienu pozīciju katrā kolonnā)**

- |                  |                          |                                            |                          |
|------------------|--------------------------|--------------------------------------------|--------------------------|
| Rīga vai Pierīga | <input type="checkbox"/> | Apdzīvotā vieta (AV) līdz 2000 iedzīvotāju | <input type="checkbox"/> |
| Vidzemes reģions | <input type="checkbox"/> | AV no 2001 līdz 4000 iedzīvotāju           | <input type="checkbox"/> |
| Kurzemes reģions | <input type="checkbox"/> | AV no 4001 līdz 10000 iedzīvotāju          | <input type="checkbox"/> |
| Zemgales reģions | <input type="checkbox"/> | AV no 10001 līdz 50000 iedzīvotāju         | <input type="checkbox"/> |
| Latgales reģions | <input type="checkbox"/> | AV ar iedzīvotāju skaitu virs 50000        | <input type="checkbox"/> |

**37. Jūsu ierosinājumi HNS pacientu veselības aprūpes uzlabošanai**

---

---

---

---

---

---

---

Pateicamies par veltīto laiku un Jūsu ieguldījumu hroniskā noguruma sindroma pacientu veselības aprūpes uzlabošanā!
